# Supplementary material
Source: Springer Nature journal article supplement (https://www.springermedizin.de/resource/supplementary/12936_2012_2635_MOESM6_ESM.pdf/9544882)

**2007**

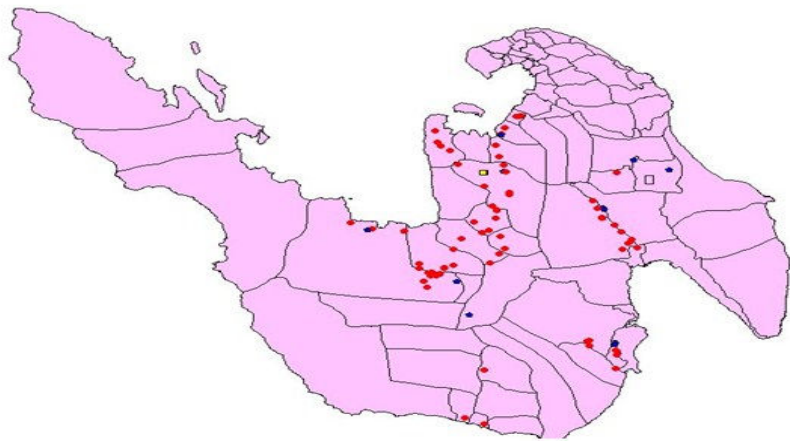

**2008**

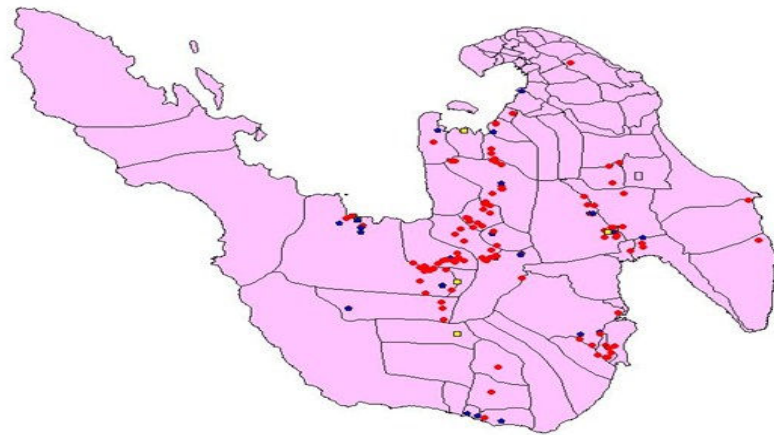

**2009**

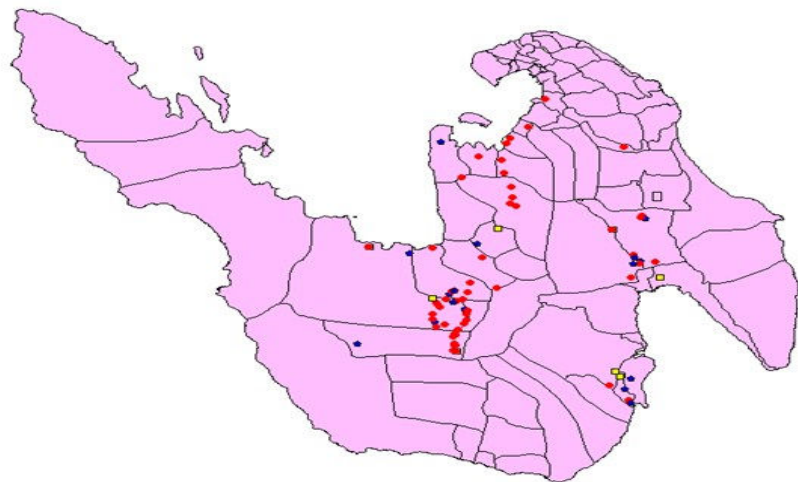

**2010**

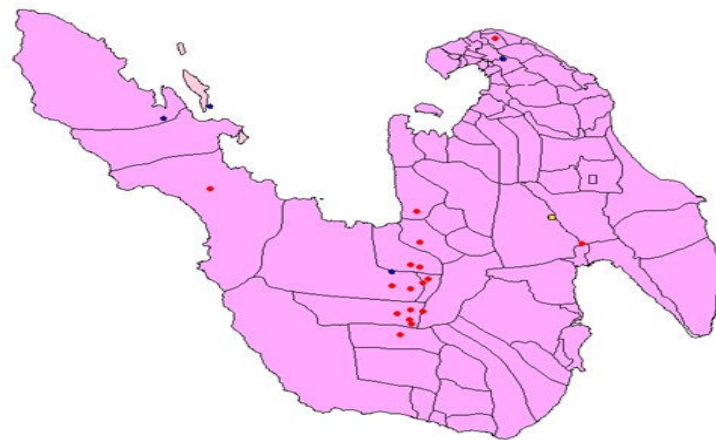

■ Mix  
● Pf  
● Pv

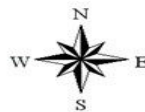

4 0 4 8 Kilometers

Supplement: MOESM6 [file 9544882]
